# Supplementary material for: The Protective Role of Symmetric Stem Cell Division on the Accumulation of Heritable Damage
Source: PubMed Central journal article supplement (PMC4133021; doi:10.1371/journal.pcbi.1003802), 2014-08-14

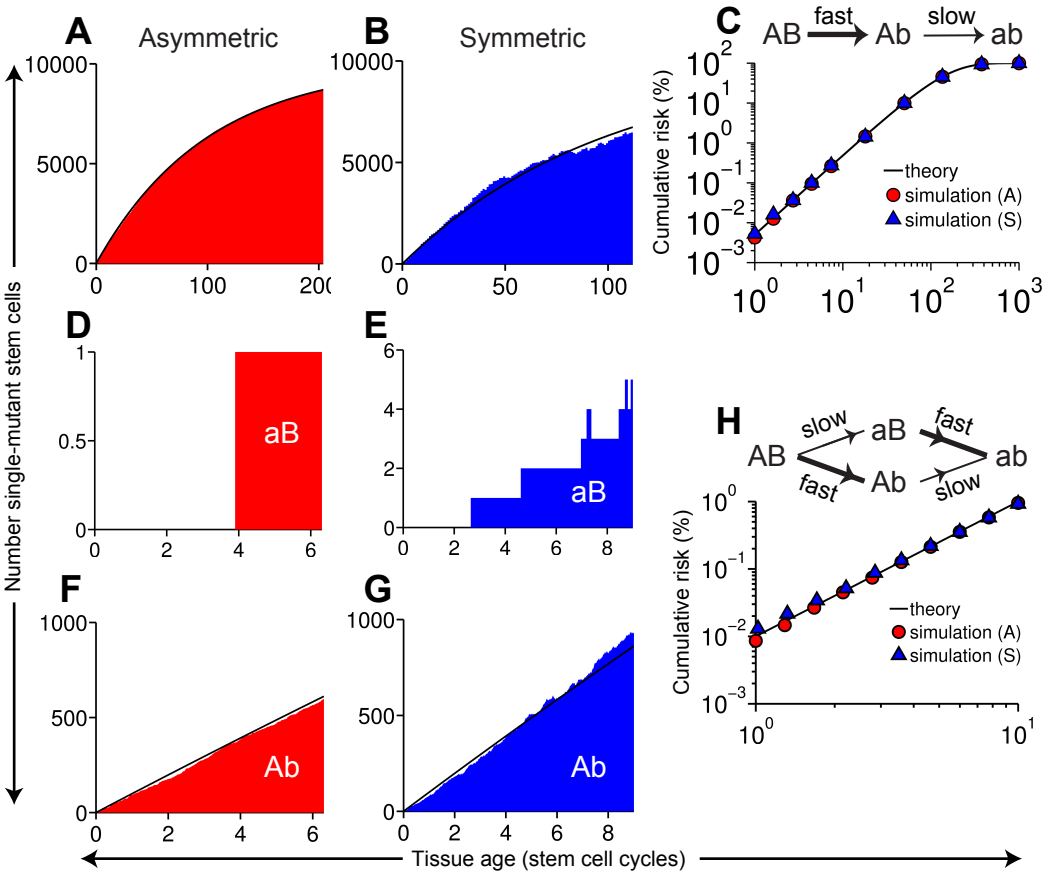

Supplement: pcbi.1003802.s003.pdf [file pcbi.1003802.s003.pdf]
