# Supplementary material for: The Protective Role of Symmetric Stem Cell Division on the Accumulation of Heritable Damage
Source: PubMed Central journal article supplement (PMC4133021; doi:10.1371/journal.pcbi.1003802), 2014-08-14
Supplement: pcbi.1003802.s010.pdf [file pcbi.1003802.s010.pdf]

**Table S2. Numerical screen of small-population model with non-monotonic mutation rates (Fig. 2I)**

| <u>Parameter</u>       | <u>Physical meaning</u> | <u>Range of values</u>    |
|------------------------|-------------------------|---------------------------|
| N                      | Population size         | $10^0 - 10^3$ stem cells  |
| L                      | Organism lifetime       | $10^2 - 10^3$ cell cycles |
| $u_i; i = 0 \dots K-1$ | Mutation rates          | $10^{-9} - 10^{-2}$       |
| K                      | # accumulated mutations | 2                         |
