# Supplementary material for: The Protective Role of Symmetric Stem Cell Division on the Accumulation of Heritable Damage
Source: PubMed Central journal article supplement (PMC4133021; doi:10.1371/journal.pcbi.1003802), 2014-08-14
Supplement: pcbi.1003802.s011.pdf [file pcbi.1003802.s011.pdf]

**Table S3. Numerical screen of large-population model with “monotonic” mutation rates (Figs. 2J, K)**

| <u>Parameter</u>         | <u>Physical meaning</u> | <u>Range of values</u>                                         |
|--------------------------|-------------------------|----------------------------------------------------------------|
| N                        | Population size         | $10^4 - 10^9$ stem cells                                       |
| L                        | Organism lifetime       | $10^2 - 10^3$ cell cycles                                      |
| $u_i; i = 0 \dots k$     | Early mutation rates    | $10^{-9} - 10^{-6}$ (Fig. 2J)<br>$10^{-5} - 10^{-2}$ (Fig. 2K) |
| $u_i; i = k+1 \dots K-1$ | Late mutation rates     | $10^{-5} - 10^{-2}$ (Fig. 2J)<br>$10^{-9} - 10^{-6}$ (Fig. 2K) |
| k                        | Transition stage        | 0 ... K-2 (chosen uniformly)                                   |
| K                        | # accumulated mutations | 2 – 10 (chosen uniformly)                                      |
