# Supplementary material for: The Protective Role of Symmetric Stem Cell Division on the Accumulation of Heritable Damage
Source: PLOS journal article supplement (doi:10.1371/journal.pcbi.1003802), 2014-08-14

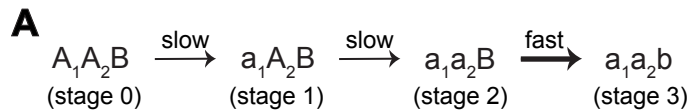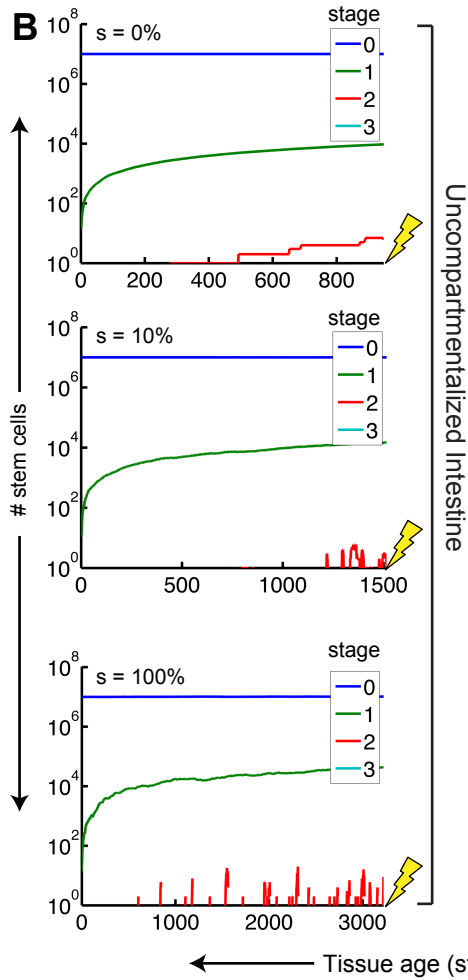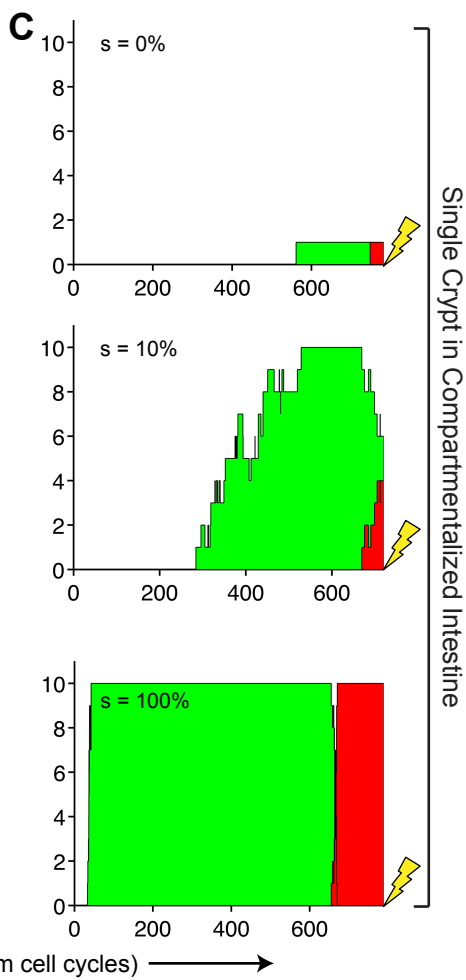

Supplement: S4 (10.1371/journal.pcbi.1003802.s004) [file journal.pcbi.1003802.s004]
